# Supplementary material for: Web use remains highly regional even in the age of global platform monopolies
Source: PLoS One. 2023 Jan 11;18(1):e0278594. doi: 10.1371/journal.pone.0278594 (PMC9833580; doi:10.1371/journal.pone.0278594)
Supplement: S4 Table — (DOCX) [file pone.0278594.s004.docx]

| **S4 Table. QAP correlations across variable matrices (based on 59 common countries).** | | | | | | | |  |  |
| --- | --- | --- | --- | --- | --- | --- | --- | --- | --- |
|  | 1 | 2 | 3 | 4 | 5 | 6 | 7 | 8 | 9 |
| 1. Alexa similarity |  |  |  |  |  |  |  |  |  |
| 1. YouTube similarity | .44*** |  |  |  |  |  |  |  |  |
| 1. Twitter topic similarity | .32*** | .47*** |  |  |  |  |  |  |  |
| 1. Language composition | .49*** | .70*** | .47*** |  |  |  |  |  |  |
| 1. Sharing border | .18*** | .25*** | .16*** | .23*** |  |  |  |  |  |
| 1. Internet market size | −.01 | −.14** | −.05 | −.02 | .01 |  |  |  |  |
| 1. US effect | .13* | .004 | .03 | .14* | −.01 | .64* |  |  |  |
| 1. China effect# | −.45** | NA | NA | −.05 | .06** | .78** | −.01 |  |  |
| 1. English prevalence | .11* | .04 | .26*** | .17*** | .02 | .27* | .46* | −.01# |  |
| * p < .05 ** p < .01 *** p < .001  # Correlations of China effect are based all available countries, except for YouTube and Twitter (did not have data for China). | | | | | | | | | | |
