# Supplementary material for: Web use remains highly regional even in the age of global platform monopolies
Source: PLoS One. 2023 Jan 11;18(1):e0278594. doi: 10.1371/journal.pone.0278594 (PMC9833580; doi:10.1371/journal.pone.0278594)
Supplement: S6 Table — A. QAP regressions for YouTube trending video similarity across countries (September, N = 98). B. QAP regressions for YouTube trending video similarity across countries (November, N = 98). (DOCX) [file pone.0278594.s006.docx]

| **S6A Table. QAP regressions for YouTube trending video similarity across countries (September, N = 98).** | | | |
| --- | --- | --- | --- |
| Variables | *b* | | |
| Block 1 | Block 2 | Block 3 |
| Intercept | 0.06*** | 0.06** | 0.06** |
| Language composition | .07*** | .07*** | .07*** |
| Sharing border | .08*** | .08*** | .08*** |
| Internet market size | −.02*** | −.02*** | −.02*** |
| US effect |  | .01 | .02 |
| English prevalence |  |  | −.005** |
| R2 | .50*** | .50*** | .50*** |
| Adjusted R2 | .50*** | .50*** | .50*** |
| Notes: 1,000 permutations for estimating standard errors.  Coefficients presented are standardized coefficients.  * p < .05 ** p < .01 *** p < .001 | | | |

| **S6B Table. QAP regressions for YouTube trending video similarity across countries (November, N = 98).** | | | |
| --- | --- | --- | --- |
| Variables | *b* | | |
| Block 1 | Block 2 | Block 3 |
| Intercept | 0.05** | 0.05* | 0.05* |
| Language composition | .06*** | .06*** | .06*** |
| Sharing border | .09*** | .09*** | .09*** |
| Internet market size | −.02*** | −.03*** | −.03*** |
| US effect |  | .03 | .04 |
| English prevalence |  |  | −.004* |
| R2 | .47*** | .47*** | .47*** |
| Adjusted R2 | .47*** | .47*** | .47*** |
| Notes: 1,000 permutations for estimating standard errors.  Coefficients presented are standardized coefficients.  * p < .05 ** p < .01 *** p < .001 | | | |
